# Supplementary material for: Adipose HuR protects against diet-induced obesity and insulin resistance
Source: PubMed Central journal article supplement (PMC6542850; doi:10.1038/s41467-019-10348-0), 2019-05-30
Supplement: 41467_2019_10348_MOESM1_ESM.pdf [file 41467_2019_10348_MOESM1_ESM.pdf]

**SUPPLEMENTARY INFORMATION**

**Adipose HuR protects against diet-induced obesity and insulin  
resistance**

Li et al.

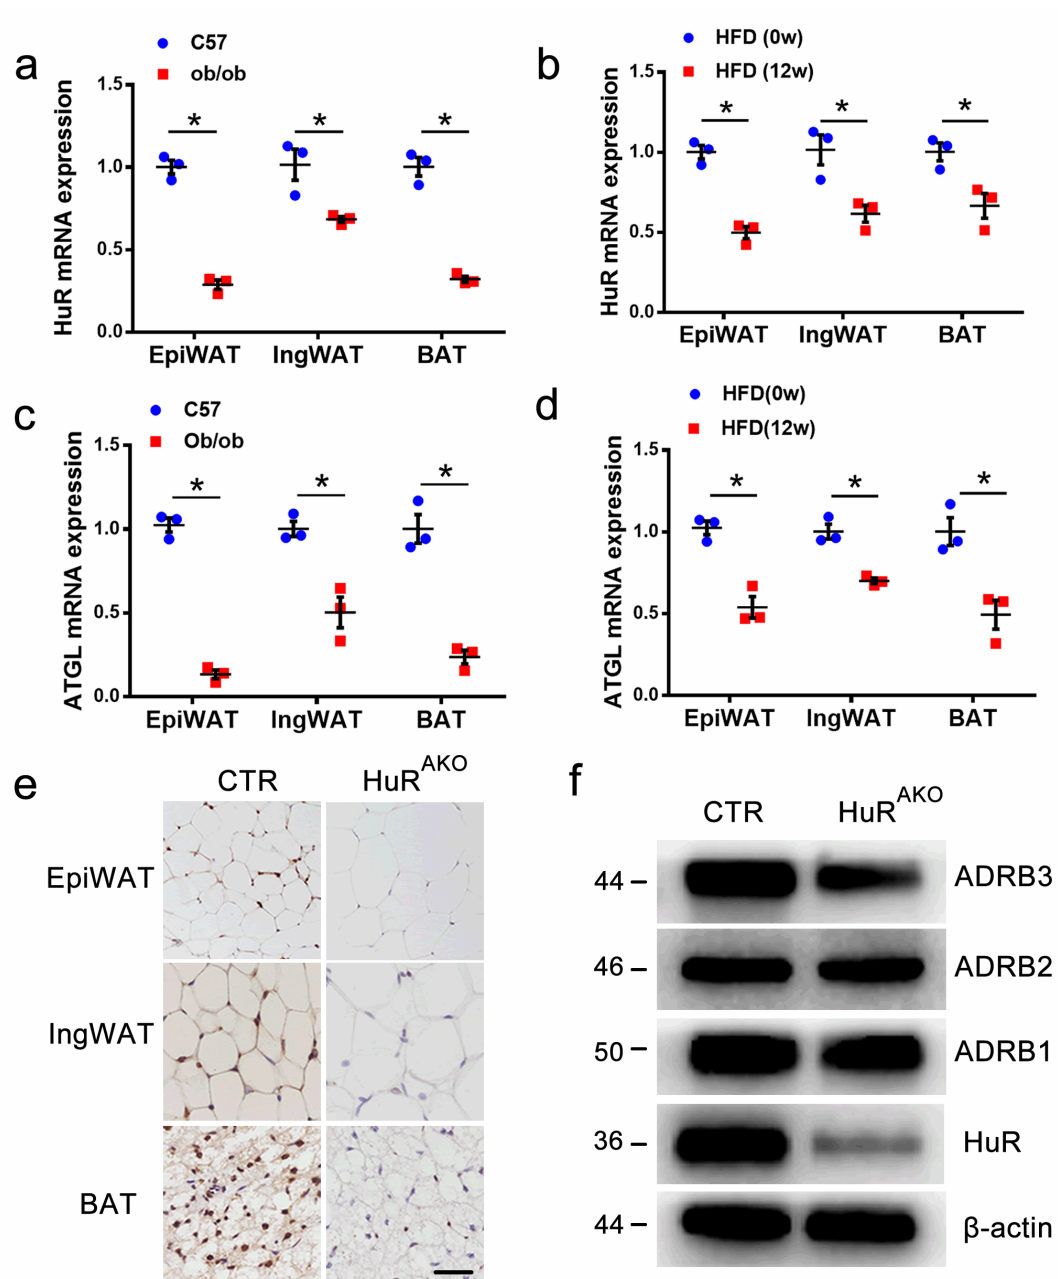

**Supplementary Fig. 1** Identification of HuR and ATGL expression in mice. **a** qPCR analysis of *HuR* mRNA levels in adipose tissue (epiWAT, ingWAT and BAT) of 20-week-old C57BL/6J and *ob/ob* mice and quantification (n=3), \*comparison of *ob/ob* vs C57. **b** Eight-week-old male C57BL/6J mice were fed with a HFD for an additional 12 weeks; western blot analysis of HuR and  $\beta$ -actin in adipose tissue and quantification (n=3), \*comparison of HFD (12w) vs HFD (0w). **c-d** qPCR analysis of *ATGL* mRNA levels in adipose tissues. **e** Immunohistochemical staining of HuR in adipose tissues. Scale bar: 50  $\mu$ m. **f** Western blot analysis of beta receptors (ADRB1, ADRB2, ADRB3) in CTR and *HuR*<sup>AKO</sup> adipose tissues. Data are represented as mean  $\pm$  SEM. Significance was determined by Student's t-test analysis, \*P<0.05. Source data are provided as a Source Data file.

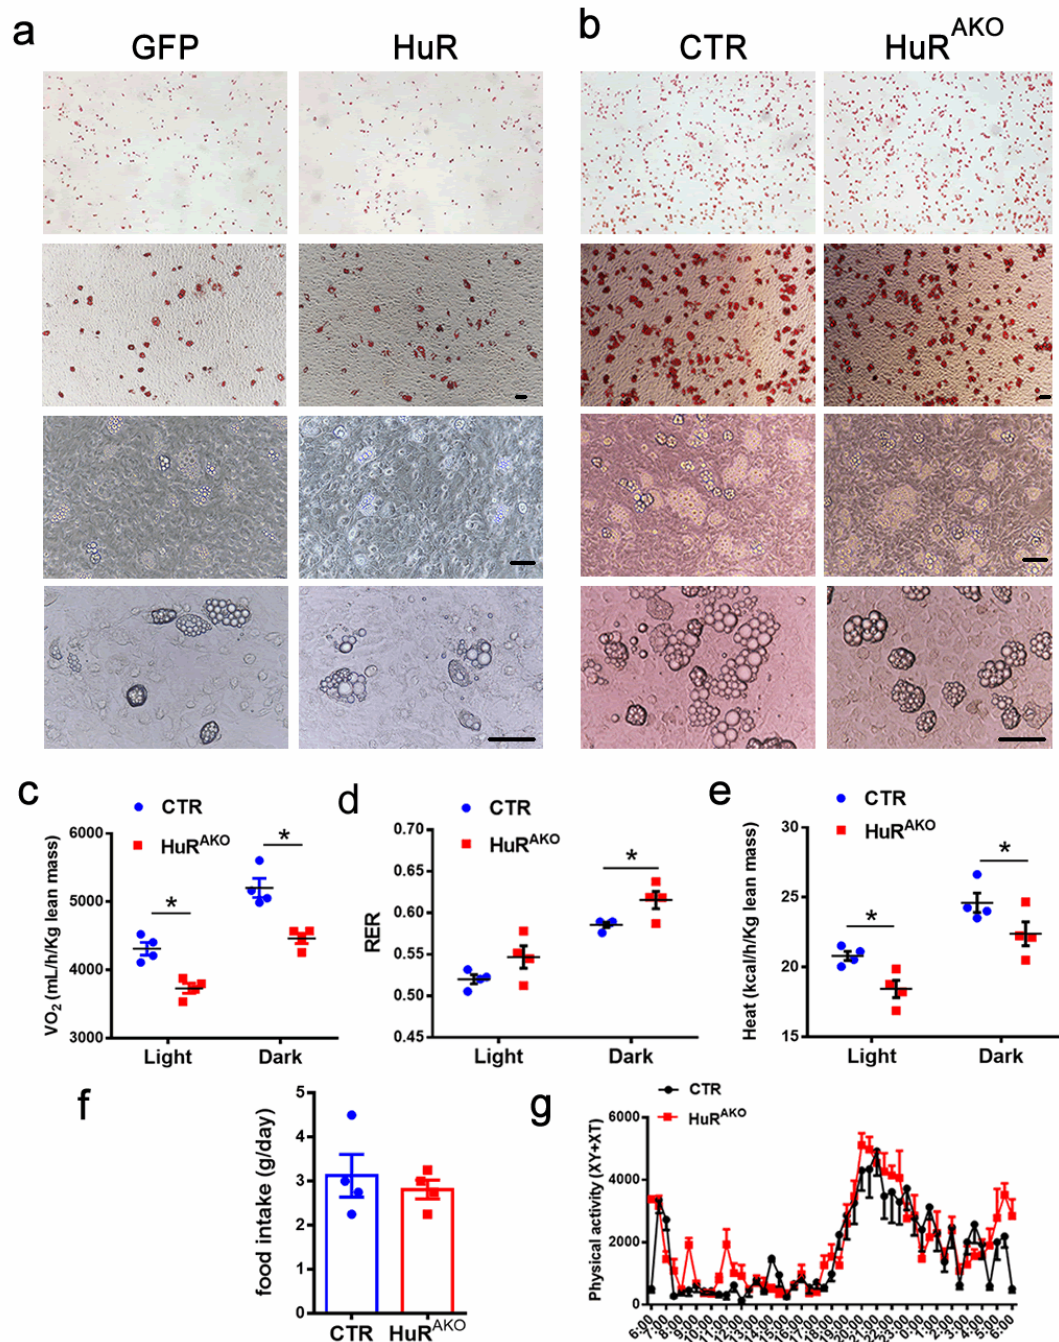

**Supplementary Fig. 2** *HuR* doesn't affect adipose differentiation. **a-b** Representative images of differentiated lipid droplets. **a** 3T3-L1 cells were infected with adenovirus expressing GFP or *HuR* for 48 hours and then were induced to differentiation. Scale bar: 50  $\mu$ m. **b** SVFs isolated from control and *HuR*<sup>AKO</sup> mice were differentiated to adipocytes. Scale bar: 50  $\mu$ m. **c-f** Quantitative analysis of metabolism studies from control and *HuR*<sup>AKO</sup> mice fed an HFD: oxygen (O<sub>2</sub>) consumption (**c**), respiratory exchange ratio (RER) (**d**), heat production (**e**) and food intake (**f**) (n=4), \*comparison of *HuR*<sup>AKO</sup> vs control. **g** Physical activity analysis of control and *HuR*<sup>AKO</sup> mice fed an HFD (n=4). Data are represented as mean  $\pm$  SEM. Significance was determined by Student's t-test analysis, \*P<0.05. Source data are provided as a Source Data file.

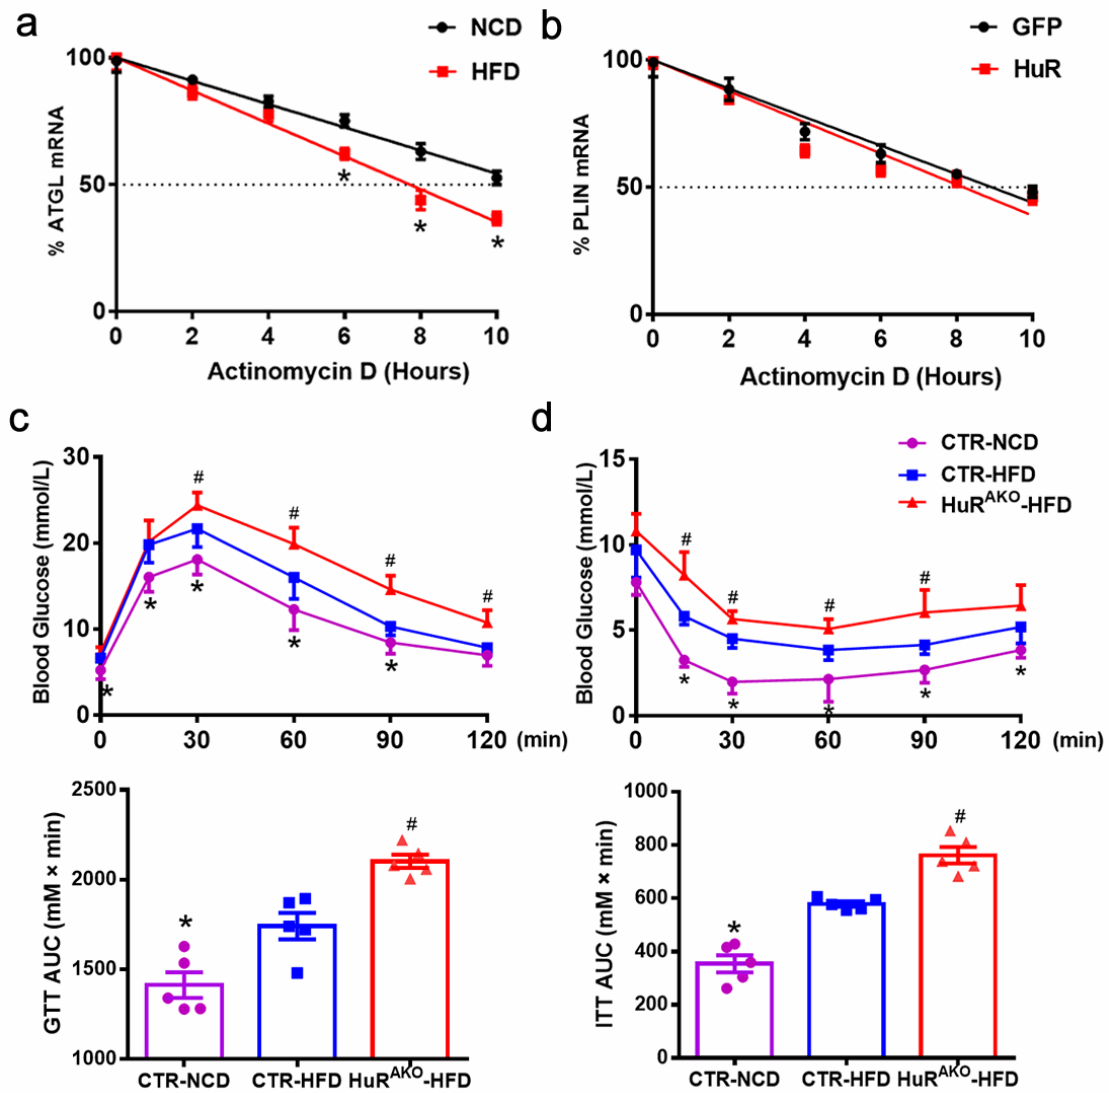

**Supplementary Fig. 3** *HuR* deletion exacerbates insulin resistance. **a** SVFs isolated from control and *HuR*<sup>AKO</sup> mice were differentiated to adipocytes and stimulated with 10  $\mu\text{g mL}^{-1}$  actinomycin D. *ATGL* mRNA level was determined by qPCR (n=3). \*comparison of HFD vs NCD. **b** Differentiated 3T3-L1 adipocytes were infected with adenovirus expressing GFP or *HuR* for 48 hours and stimulated with 10  $\mu\text{g mL}^{-1}$  actinomycin D. *PLIN* mRNA level was determined by qPCR (n=3). **c-d** Glucose tolerance test (c) and insulin tolerance test (d) in NCD and HFD-fed control and HFD-fed *HuR*<sup>AKO</sup> mice (n=5). Lower panel, area under curve. \*comparison of CTR-NCD vs CTR-HFD, #comparison of *HuR*<sup>AKO</sup>-HFD vs CTR-HFD. Data are represented as mean  $\pm$  SEM. Significance was determined by Student's t-test analysis (a-b) and one-way analysis of variance (ANOVA) (c-d), \*P<0.05, # P<0.05. Source data are provided as a Source Data file.

| <i>Genes</i>                    | Forward                  | Reverse                |
|---------------------------------|--------------------------|------------------------|
| <i>HuR</i>                      | ACACTGAACGGCTTGAGACT     | CCTCTGGACAAACCTGTGGTC  |
| <i>C/EBP<math>\alpha</math></i> | CTAGGAGATTCCGGTGTGGC     | CCCGAGAGGAAGCAGGAATC   |
| <i>Fabp4</i>                    | TGATGCCTTTGTGGGAACCT     | TTGTGGTCGACTTTCCATCCC  |
| <i>PPAR<math>\gamma</math></i>  | GTGAGACCAACAGCCTGACG     | CTTCCATCACGGAGAGGTCC   |
| <i>ACC</i>                      | TGTACAAGCAGTGTGGGCTGGCT  | CCACATGGCCTGGCTTGGAGGG |
| <i>FAS</i>                      | GAGGACACTCAAGTGGCTGA     | GTGAGGTTGCTGTCGTCTGT   |
| <i>LPL</i>                      | GCCTTTCTCCTGATGACGCT     | AACTCAGGCAGAGCCCTTTC   |
| <i>ATGL</i>                     | GACAGCTCCACCAACATCCA     | GAGGCGGTAGAGATTGCGAA   |
| <i>PLIN</i>                     | CCCGGCTCTTCAATACCCCTC    | TGGTGGCAGGAGGAACTCTA   |
| <i>Srebp-1c</i>                 | GGAGCCATGGATTGCACATT     | GGCCCGGAAGTCACTGT      |
| <i>Fatp1</i>                    | CGCTTTCTGCGTATCGTCTGCAAG | AAGATGCACGGGATCGTGTCT  |
| <i>Fatp2</i>                    | CTGATGATCGACCGTGAGAA     | TACCAGTCCCACGATGTCAG   |
| <i>Fatp3</i>                    | AGGCTGCTCGAATCAGTCAT     | AACTTGGGTTTCAGCACCAC   |
| <i>Fatp4</i>                    | CAGCAACTGTGACCTGGAGA     | CCTTCCGCAACTCTGTCTTC   |
| <i>Fatp5</i>                    | GGTTTTTGCAATCCTGTGGA     | GAAGGGTTGGTTCTTTCGAA   |
| <i>Cd36</i>                     | GGCAACCAACCACAAATTAGCA   | AAGGCTAGGAAACCATCCACC  |
| <i>CPT-1<math>\alpha</math></i> | TTGCACGAGGGAAAAATAAGC    | CCCTGCATGCGGTGGAAAAGGC |
| <i>F4/80</i>                    | TGGAATGTCAAGTCTGCACCA    | GTGGCAGGTTGCATGTTTCAG  |
| <i>Cd68</i>                     | GGGGCTCTGGGAACCTACAC     | GCCATGAATGTCCACTGTGC   |
| <i>MCPI</i>                     | AGCTGTAGTTTTTGTCAACCAAGC | TGCTTGAGGTGGTTGTGGAA   |
| <i>IL-1<math>\beta</math></i>   | AATGCCACCTTTTGACAGTGATG  | ATGTGCTGCTGCGAGATTTG   |

---

|                                 |                      |                           |
|---------------------------------|----------------------|---------------------------|
| <i>TNF-<math>\alpha</math></i>  | AGGCACTCCCCAAAAGATG  | CCACTTGGTGGTTTGTGAGTG     |
| <i>IFN-<math>\gamma</math></i>  | GGGTTGTATCTGGGGGTGGG | GTCACTGCAGCTCTGAATGTTTCTT |
| <i>iNOS</i>                     | CCCAGTTGTGCATCGACCTA | ACCACTCGTACTTGGGATGC      |
| <i><math>\beta</math>-actin</i> | ACACTGTGCCCATCTACGAG | CAGCACTGTGTTGGCATAGAG     |

---

**Supplementary Table 1.** The list of primers sequence.

| <i>Genes</i>     | <b>ARE</b>   | <b>Function about adipose tissue</b>                                                                                                                                                                              |
|------------------|--------------|-------------------------------------------------------------------------------------------------------------------------------------------------------------------------------------------------------------------|
|                  | <b>sites</b> |                                                                                                                                                                                                                   |
| <i>Isl1</i>      | 6            | regulating insulin gene expression; associated with maturity-onset diabetes of the young                                                                                                                          |
| <i>Ces1f</i>     | 2            | hydrolysis of short-chain fatty acid ester; promote adipocyte lipolysis                                                                                                                                           |
| <i>Fgf1</i>      | 1            | a metabolic hormone crucial for the management of nutrient stress, glycaemic control and insulin sensitivity                                                                                                      |
| <i>Cdh11</i>     | 21           | regulate adipose tissue inflammation                                                                                                                                                                              |
| <i>Ctf1</i>      | 8            | common genetic variation in CTF1 could contribute to insulin sensitivity in humans                                                                                                                                |
| <i>Pon1</i>      | 1            | potent TAG-lowering property                                                                                                                                                                                      |
| <i>Nnt</i>       | 2            | NNT mRNA expression is significantly higher in visceral fat of obese patients and correlates with body weight, BMI, % body fat, visceral and sc fat area, waist and hip circumference, and fasting plasma insulin |
| <i>Acsm3</i>     | 7            |                                                                                                                                                                                                                   |
| <i>Pcdhgb1</i>   | 2            |                                                                                                                                                                                                                   |
| <i>Pcdhgb4</i>   | 2            |                                                                                                                                                                                                                   |
| <i>Tnfrsf11b</i> | 12           |                                                                                                                                                                                                                   |
| <i>Mmp9</i>      | 5            |                                                                                                                                                                                                                   |
| <i>Gjb3</i>      | 1            |                                                                                                                                                                                                                   |
| <i>Hcar2</i>     | 1            |                                                                                                                                                                                                                   |
| <i>Tmem255a</i>  | 8            |                                                                                                                                                                                                                   |

---

|                 |    |
|-----------------|----|
| <i>Myrf</i>     | 2  |
| <i>Fabp3</i>    | 1  |
| <i>Wt1</i>      | 2  |
| <i>Lrrn4</i>    | 1  |
| <i>Stmn2</i>    | 4  |
| <i>Tmem151a</i> | 3  |
| <i>Wnt2b</i>    | 6  |
| <i>Upk3b</i>    | 1  |
| <i>Ppl</i>      | 1  |
| <i>Zbtb7c</i>   | 2  |
| <i>Pfkfb3</i>   | 8  |
| <i>Lamc3</i>    | 6  |
| <i>Osr1</i>     | 3  |
| <i>Atp1b1</i>   | 12 |
| <i>Nkx2-9</i>   | 3  |
| <i>Efs</i>      | 3  |
| <i>Cdc42se1</i> | 4  |
| <i>Cd24a</i>    | 4  |
| <i>Tnk1</i>     | 1  |
| <i>Adgrd1</i>   | 2  |
| <i>Wfikkn2</i>  | 1  |
| <i>Il22ra1</i>  | 1  |

---



---

|                      |    |
|----------------------|----|
| <i>2010300C02Rik</i> | 1  |
| <i>Capn6</i>         | 5  |
| <i>Rtn1</i>          | 1  |
| <i>Scn3b</i>         | 2  |
| <i>Stk26</i>         | 15 |
| <i>Fam84a</i>        | 5  |
| <i>Emp2</i>          | 2  |
| <i>Crb2</i>          | 1  |
| <i>Dkk3</i>          | 4  |
| <i>Gpcpd1</i>        | 5  |
| <i>Aldh1a2</i>       | 6  |
| <i>Ildr2</i>         | 13 |
| <i>Ugt1a1</i>        | 4  |
| <i>Bnc1</i>          | 10 |
| <i>Hmgn2</i>         | 1  |
| <i>Flvcr2</i>        | 5  |
| <i>Lrrc1</i>         | 5  |
| <i>Bco2</i>          | 1  |
| <i>Faim2</i>         | 1  |
| <i>Rasl10b</i>       | 2  |
| <i>Matn4</i>         | 1  |
| <i>Sv2a</i>          | 3  |

---

---

|                      |    |
|----------------------|----|
| <i>Thbd</i>          | 8  |
| <i>Bhlhe41</i>       | 12 |
| <i>Arsg</i>          | 1  |
| <i>Baiap2l1</i>      | 8  |
| <i>Csrp2</i>         | 1  |
| <i>Cldn10</i>        | 2  |
| <i>Nav3</i>          | 1  |
| <i>Lrrc4</i>         | 7  |
| <i>Ccdc122</i>       | 1  |
| <i>Gata6</i>         | 6  |
| <i>Smtnl2</i>        | 4  |
| <i>Ikzf2</i>         | 34 |
| <i>Cgnl1</i>         | 4  |
| <i>I700029J07Rik</i> | 1  |
| <i>Traf3ip2</i>      | 2  |
| <i>Slc23a4</i>       | 1  |

---

**Supplementary Table 2.** The list of potential HuR targets.
