# Supplementary material for: Adipose HuR protects against diet-induced obesity and insulin resistance
Source: PubMed Central journal article supplement (PMC6542850; doi:10.1038/s41467-019-10348-0), 2019-05-30
Supplement: 41467_2019_10348_MOESM3_ESM.pdf [file 41467_2019_10348_MOESM3_ESM.pdf]

## Description of Additional Supplementary Files

**File name:** Supplementary Data 1

**Description:** The differentially expressed genes in HuR-deficient adipose tissues (>1.5 fold change).  
#165,196,210: Control; #162,193,227: HuR<sup>AKO</sup>.
